# Supplementary material for: Evaluating a New Relative Phenological Correction and the Effect of Sentinel-Based Earth Engine Compositing Approaches to Map Fire Severity and Burned Area
Source: MDPI journal article supplement (doi:10.3390/rs14133122), 2022-06-29
Supplement: s1 [file s1]

## Supplementary Materials

**Table S1.** Acquired Sentinel 2 L1C level images from *Earth Explorer* summary.

| Wildfire | Type | Product ID                         | Cloud cover (%) |
|----------|------|------------------------------------|-----------------|
| Site 1   | Pre  | L1C_T13QEG_A010377_20190302T174157 | 0.00            |
|          | Post | L1C_T13QEG_A011807_20190610T174426 | 23.40           |
| Site 2   | Pre  | L1C_T13QDG_A010377_20190302T174157 | 0.00            |
|          | Post | L1C_T13QDG_A020930_20190625T173920 | 5.60            |
| Site 3   | Pre  | L1C_T13RDJ_A010377_20190302T174157 | 0.00            |
|          | Post | L1C_T13RDJ_A011378_20190511T174054 | 0.6             |

**Table S2.** Sentinel-L2A imagery period window for GEE composites indices calculation.

| Wildfire | Composite length (months) | Pre-fire              | Post-fire             |
|----------|---------------------------|-----------------------|-----------------------|
| Site 1   | 1                         | 2019/03/20–2019/04/20 | 2019/06/01–2019/07/01 |
|          | 3                         | 2019/01/20–2019/04/20 | 2019/06/01–2019/09/01 |
| Site 2   | 1                         | 2019/04/13–2019/05/13 | 2019/06/29–2019/07/29 |
|          | 3                         | 2019/02/13–2019/05/13 | 2019/06/29–2019/09/29 |
| Site 3   | 1                         | 2019/03/10–2019/04/10 | 2019/05/10–2019/06/10 |
|          | 3                         | 2019/01/10–2019/04/10 | 2019/05/10–2019/08/10 |

**Table S3.** Coefficient of Determination ( $R^2$ ) and RMSE ( $\theta$ ) of univariate linear models between spectral indices (Table 3) (paired single day images) and field-based severity variables in the three wildfires of Durango, Mexico.

| Paired Spectral Indices | Field-based severity indices and fire severity per strata |          |                  |          |       |          |                   |          |       |          |       |          |       |          |       |          |       |          |
|-------------------------|-----------------------------------------------------------|----------|------------------|----------|-------|----------|-------------------|----------|-------|----------|-------|----------|-------|----------|-------|----------|-------|----------|
|                         | FSI                                                       |          | FSI <sub>2</sub> |          | wFSI  |          | wFSI <sub>2</sub> |          | OCS   |          | CCS   |          | SCS   |          | UCS   |          | SSI   |          |
|                         | $R^2$                                                     | $\theta$ | $R^2$            | $\theta$ | $R^2$ | $\theta$ | $R^2$             | $\theta$ | $R^2$ | $\theta$ | $R^2$ | $\theta$ | $R^2$ | $\theta$ | $R^2$ | $\theta$ | $R^2$ | $\theta$ |
| dNBR1c                  | 0.756                                                     | 62       | 0.758            | 61       | 0.721 | 66       | 0.739             | 64       | 0.685 | 71       | 0.674 | 72       | 0.676 | 72       | 0.639 | 75       | 0.645 | 74       |
| dNBR2c                  | 0.695                                                     | 97       | 0.696            | 97       | 0.683 | 99       | 0.680             | 99       | 0.661 | 104      | 0.636 | 107      | 0.663 | 104      | 0.561 | 116      | 0.598 | 111      |
| dNBR3c                  | 0.766                                                     | 138      | 0.767            | 138      | 0.742 | 145      | 0.749             | 143      | 0.715 | 155      | 0.691 | 161      | 0.713 | 156      | 0.631 | 173      | 0.651 | 169      |
| dNBR4nc                 | 0.721                                                     | 94       | 0.722            | 94       | 0.705 | 97       | 0.704             | 97       | 0.689 | 101      | 0.662 | 105      | 0.691 | 101      | 0.574 | 116      | 0.616 | 110      |
| dNBR5nc                 | 0.782                                                     | 134      | 0.784            | 134      | 0.754 | 142      | 0.763             | 140      | 0.733 | 151      | 0.710 | 157      | 0.732 | 152      | 0.638 | 173      | 0.660 | 167      |
| RBR1c                   | 0.784                                                     | 46       | 0.787            | 46       | 0.739 | 51       | 0.763             | 48       | 0.715 | 53       | 0.705 | 54       | 0.703 | 55       | 0.661 | 58       | 0.657 | 58       |
| RBR2c                   | 0.764                                                     | 85       | 0.765            | 85       | 0.723 | 93       | 0.736             | 90       | 0.730 | 93       | 0.709 | 96       | 0.723 | 94       | 0.616 | 109      | 0.625 | 108      |
| RBR3c                   | 0.841                                                     | 92       | 0.841            | 92       | 0.780 | 108      | 0.809             | 101      | 0.789 | 107      | 0.771 | 112      | 0.778 | 110      | 0.691 | 128      | 0.678 | 131      |
| RBR4nc                  | 0.786                                                     | 77       | 0.787            | 77       | 0.741 | 85       | 0.756             | 83       | 0.753 | 84       | 0.729 | 88       | 0.748 | 85       | 0.624 | 103      | 0.645 | 100      |
| RBR5nc                  | 0.850                                                     | 86       | <b>0.851</b>     | 86       | 0.786 | 103      | 0.816             | 95       | 0.800 | 100      | 0.782 | 105      | 0.791 | 103      | 0.691 | 124      | 0.685 | 125      |
| dBAIS21c                | 0.762                                                     | 41       | 0.766            | 41       | 0.745 | 43       | 0.748             | 42       | 0.727 | 45       | 0.710 | 46       | 0.725 | 45       | 0.596 | 54       | 0.655 | 50       |
| dBAIS22c                | 0.820                                                     | 57       | 0.824            | 56       | 0.777 | 63       | 0.799             | 60       | 0.775 | 64       | 0.772 | 65       | 0.764 | 66       | 0.657 | 78       | 0.671 | 77       |
| dBAIS23nc               | 0.793                                                     | 38       | 0.796            | 37       | 0.777 | 39       | 0.777             | 39       | 0.759 | 41       | 0.742 | 43       | 0.757 | 42       | 0.614 | 51       | 0.673 | 47       |
| dBAIS24nc               | 0.829                                                     | 55       | 0.834            | 54       | 0.780 | 62       | 0.805             | 58       | 0.793 | 61       | 0.790 | 61       | 0.780 | 63       | 0.659 | 77       | 0.667 | 76       |
| dCIrec                  | 0.493                                                     | 367      | 0.492            | 367      | 0.498 | 365      | 0.494             | 366      | 0.452 | 388      | 0.417 | 400      | 0.467 | 387      | 0.406 | 397      | 0.462 | 378      |
| dND1rec                 | 0.538                                                     | 89       | 0.541            | 89       | 0.554 | 88       | 0.549             | 88       | 0.503 | 94       | 0.479 | 96       | 0.514 | 93       | 0.425 | 100      | 0.492 | 94       |
| dND2rec                 | 0.451                                                     | 94       | 0.456            | 94       | 0.477 | 92       | 0.468             | 92       | 0.419 | 98       | 0.402 | 99       | 0.439 | 97       | 0.359 | 101      | 0.439 | 95       |
| dNDVI1rec               | 0.592                                                     | 73       | 0.593            | 73       | 0.598 | 72       | 0.595             | 72       | 0.558 | 77       | 0.520 | 80       | 0.574 | 76       | 0.480 | 82       | 0.525 | 78       |
| dNDVI2rec               | 0.608                                                     | 76       | 0.609            | 76       | 0.602 | 76       | 0.606             | 76       | 0.577 | 80       | 0.543 | 83       | 0.595 | 79       | 0.492 | 86       | 0.536 | 82       |
| dNDVI3c                 | 0.642                                                     | 100      | 0.644            | 100      | 0.647 | 100      | 0.639             | 101      | 0.604 | 107      | 0.572 | 111      | 0.618 | 106      | 0.529 | 115      | 0.558 | 111      |
| dNDVI4rec               | 0.569                                                     | 73       | 0.571            | 72       | 0.564 | 73       | 0.571             | 72       | 0.526 | 77       | 0.492 | 80       | 0.548 | 76       | 0.480 | 80       | 0.515 | 77       |
| dNDVI5rec               | 0.235                                                     | 18       | 0.235            | 18       | 0.237 | 18       | 0.221             | 18       | 0.280 | 18       | 0.276 | 18       | 0.265 | 18       | 0.121 | 20       | 0.171 | 19       |
| dNDVI6nc                | 0.646                                                     | 94       | 0.648            | 94       | 0.651 | 94       | 0.642             | 95       | 0.612 | 100      | 0.578 | 104      | 0.627 | 99       | 0.528 | 109      | 0.560 | 105      |
| dNDVI7renc              | 0.572                                                     | 68       | 0.574            | 68       | 0.570 | 68       | 0.575             | 68       | 0.536 | 72       | 0.499 | 75       | 0.559 | 71       | 0.476 | 75       | 0.521 | 72       |
| dNDVI8renc              | 0.358                                                     | 16       | 0.36             | 16       | 0.340 | 16       | 0.338             | 16       | 0.386 | 16       | 0.392 | 16       | 0.369 | 16       | 0.236 | 18       | 0.253 | 17       |
| dMSR1rec                | 0.519                                                     | 166      | 0.520            | 166      | 0.517 | 166      | 0.522             | 165      | 0.472 | 176      | 0.438 | 182      | 0.492 | 175      | 0.444 | 178      | 0.480 | 172      |
| dMSR2rec                | 0.242                                                     | 26       | 0.242            | 26       | 0.244 | 26       | 0.226             | 27       | 0.286 | 26       | 0.281 | 26       | 0.270 | 26       | 0.125 | 28       | 0.178 | 28       |
| dMSR3renc               | 0.522                                                     | 168      | 0.523            | 168      | 0.526 | 167      | 0.526             | 168      | 0.481 | 178      | 0.443 | 185      | 0.502 | 177      | 0.437 | 183      | 0.489 | 174      |
| dMSR4renc               | 0.361                                                     | 25       | 0.363            | 25       | 0.343 | 26       | 0.340             | 26       | 0.388 | 25       | 0.395 | 25       | 0.370 | 25       | 0.238 | 28       | 0.254 | 27       |

$R^2$  = Coefficient of determination,  $\theta$  = Root mean square error, **Suffixes:** *n* = NIR narrow B8a, *re* = red-edge bands from S2 (B5,B6,B7) *c* = phenological correction [73], **Field-based severity indices:** *FSI*= Fire Severity Index, *FSI<sub>2</sub>*= Fire Severity Index 2, *wFSI* = weighted Fire Severity Index, *wFSI<sub>2</sub>* = weighted Fire Severity Index 2, *OCS* = Overstory Crown Scorch volume, *CCS* = Canopy Crown Scorch volume, *SCS* = Subcanopy Crown Scorch volume, *UCS* = Understory Crown Scorch volume and *SSI* = Soil burn Severity Index. The model with highest correspondence is marked in bold.

**Table S4.** *GEE Composites Index* fire severity thresholds obtained using equations from table for FSI<sub>2</sub> (%) levels where: Very Low/unburned (<10), Low (10-30), Moderate (30-60), High (60-90) and Extreme (>90).

| GEE Composite | Very Low | Low     | Moderate | High    | Extreme |
|---------------|----------|---------|----------|---------|---------|
| RBRrc_AA1     | <44      | 44–152  | 152–315  | 315–478 | >478    |
| RBRrc_AM1     | <41      | 41–157  | 157–331  | 331–506 | >506    |
| RBRrc_MM1     | <38      | 38–156  | 156–332  | 332–508 | >508    |
| RBRrc_AA3     | <38      | 38–127  | 127–259  | 259–392 | >392    |
| RBRrc_AM3     | <27      | 27–122  | 122–263  | 263–405 | >405    |
| RBRrc_MM3     | <29      | 29–131  | 131–283  | 283–436 | >436    |
| RBRc_AA1      | <68      | 68–168  | 168–318  | 318–468 | >468    |
| RBRc_AM1      | <61      | 61–170  | 170–334  | 334–497 | >497    |
| RBRc_MM1      | <62      | 62–172  | 172–337  | 337–502 | >502    |
| RBRc_AA3      | <79      | 79–164  | 164–291  | 291–419 | >419    |
| RBRc_AM3      | <69      | 69–165  | 165–308  | 308–451 | >451    |
| RBRc_MM3      | <64      | 64–162  | 162–310  | 310–457 | >457    |
| dNBRrc_AA1    | <50      | 50–180  | 180–375  | 375–570 | >570    |
| dNBRrc_AM1    | <45      | 45–184  | 184–393  | 393–602 | >602    |
| dNBRrc_MM1    | <41      | 41–179  | 179–388  | 388–596 | >596    |
| dNBRrc_AA3    | <45      | 45–155  | 155–321  | 321–487 | >487    |
| dNBRrc_AM3    | <32      | 32–148  | 148–322  | 322–496 | >496    |
| dNBRrc_MM3    | <33      | 33–148  | 148–321  | 321–493 | >493    |
| dNBRc_AA1     | <84      | 84–203  | 203–380  | 380–557 | >557    |
| dNBRc_AM1     | <73      | 73–203  | 203–397  | 397–592 | >592    |
| dNBRc_MM1     | <73      | 73–202  | 202–395  | 395–589 | >589    |
| dNBRc_AA3     | <104     | 104–209 | 209–366  | 366–523 | >523    |
| dNBRc_AM3     | <97      | 97–213  | 213–387  | 387–561 | >561    |
| dNBRc_MM3     | <83      | 83–192  | 192–357  | 357–522 | >522    |

**GEE Composite** = Google Earth Engine Composite Index, produced with S2-L2A level imagery, **Suffix:** *c* = constant phenological correction, *rc* = relative phenological correction, **Composite technique:** *AA* = Average in pre and post fire composites, *AM* = Average (pre) and Minimum (post), *MM* = Minimum (pre and post) and **Time window:** 1 and 3 months.

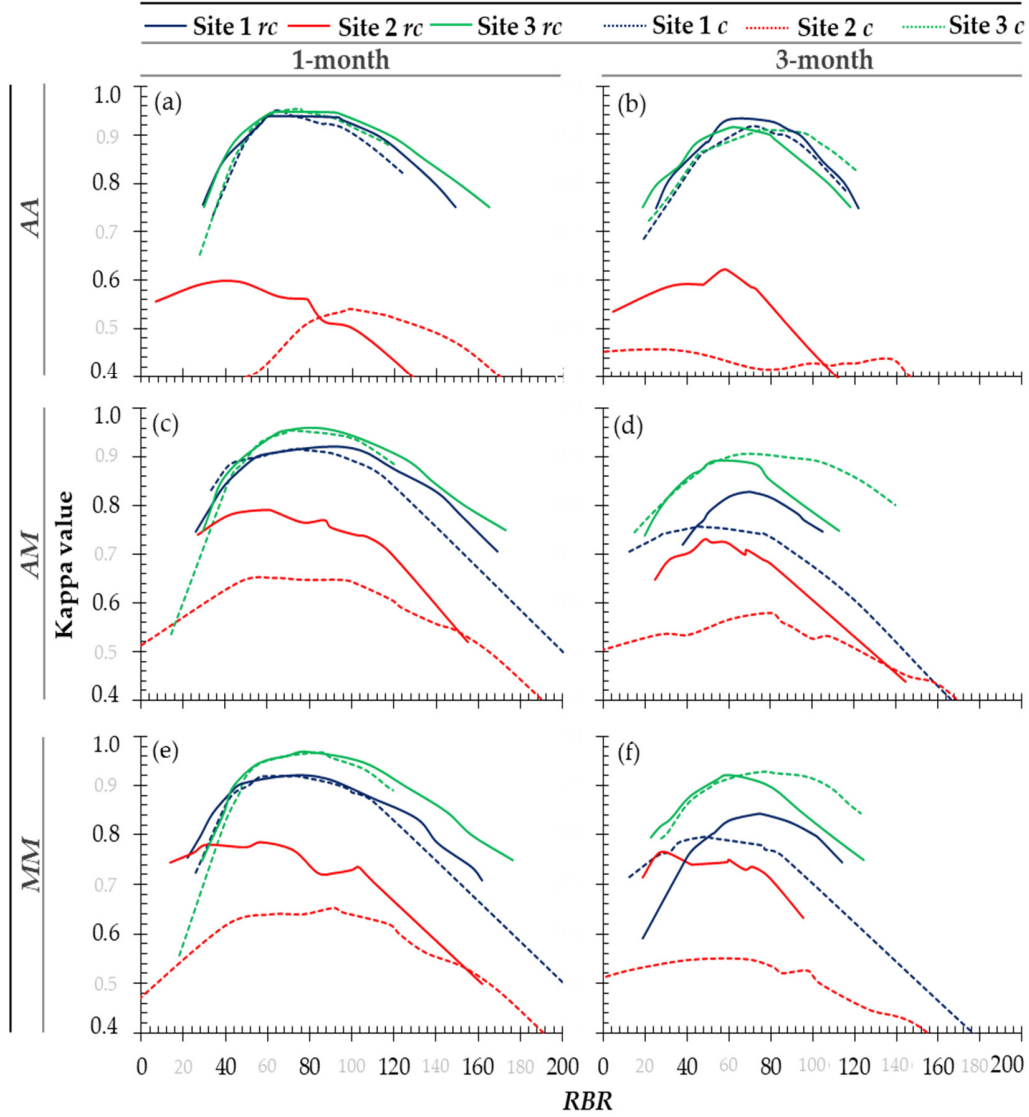

**Figure S1.** Kappa value across RBR values tested as candidate burned area thresholds for each wildfire (sites 1,2,3). Where: **Phenological correction:** *c* = constant offset phenological correction [73], *rc* = relative phenological correction (proposed in this study), **Composite technique:** *AA* = Average in pre and post fire composites (Figs. 7 a-b), *AM* = Average (pre) and Minimum (post) (Figs. 7 c-d), *MM* = Minimum (pre and post) (Figs. 7 e-f) and **Time-window:** 1 month (left column) and 3 months (right column).
